# Supplementary material for: Platelet pannexin-1 channels modulate neutrophil activation and migration but not the progression of abdominal aortic aneurysm
Source: PubMed Central journal article supplement (PMC10025481; doi:10.3389/fmolb.2023.1111108), 2023-03-06
Supplement: DataSheet4.pdf [file DataSheet4.pdf]

## Supplementary Material

### 1 Supplementary Figures and Tables

#### 1.1 Supplementary Figures

(A)

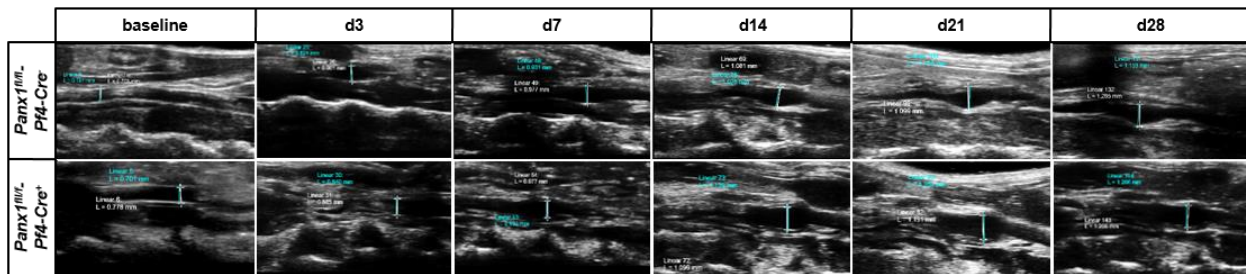

(B)

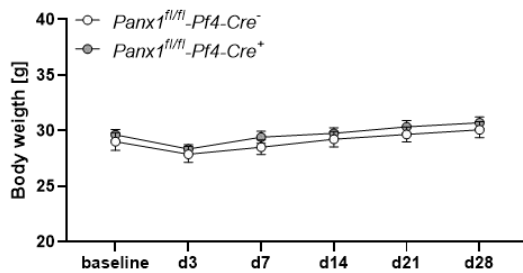

(C)

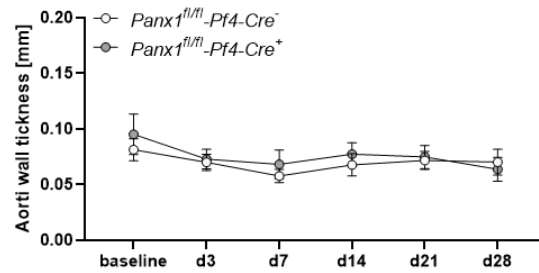

(D)

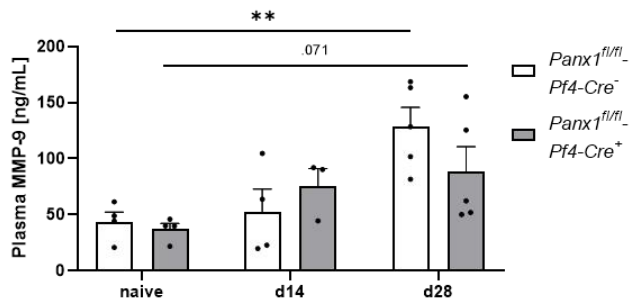

(E)

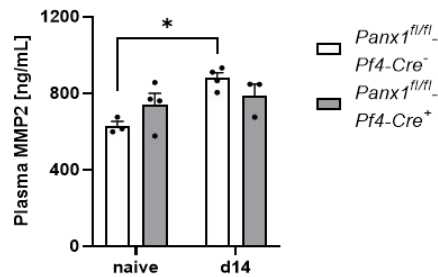

**Supplementary Figure 1.** Platelet specific *Panx1* deletion leads to unaltered aortic wall thickness during AAA development after PPE surgery. (A) Representative Ultrasound images of the abdominal aorta from *Panx1* WT (*Panx1* fl/fl Pf4-Cre<sup>-</sup>; n=11) and *Panx1* KO (*Panx1* fl/fl Pf4-Cre<sup>+</sup>; n=7) mice at day 28 after PPE perfusion. Ultrasound imaging was conducted day 0 (pre surgery) and at day 3, 7, 14, 21 and 28 after PPE. (B) Body weight of *Panx1* WT (*Panx1* fl/fl Pf4-Cre<sup>-</sup>; n=11) and *Panx1* KO

(*Panx1 fl/fl PF4-Cre<sup>+</sup>*; n=7) mice during PPE induced AAA formation. (C) Aortic wall thickness progression within the aneurysm segment in Panx1 WT (*Panx1 fl/fl PF4-Cre<sup>-</sup>*; n=11) and Panx1 KO (*Panx1 fl/fl PF4-Cre<sup>+</sup>*; n=7) mice over a time period of 28 days after PPE. The aortic wall thickness was determined via ultrasound measurements at the indicated time points; (D-E) MMP9 (D) and MMP2 (E) plasma levels of PPE operated Panx1 KO (*Panx1 fl/fl PF4-Cre<sup>+</sup>*; n=3-5) mice at day 14 and day 28, compared to Panx1 WT (*Panx1 fl/fl PF4-Cre<sup>-</sup>*; n=3-5) mice. Plasma of naïve Panx1 WT (*Panx1 fl/fl PF4-Cre<sup>-</sup>*; n=4) and Panx1 KO (*Panx1 fl/fl PF4-Cre<sup>+</sup>*; n=4) mice served as control. Data are represented as mean values  $\pm$  SEM. Statistical analysis was performed using two-way ANOVA with a Sidak's multiple comparisons post-hoc test. AAA = Abdominal aortic aneurysm; MMP-9 = Matrix metalloproteinase-9; MMP-2 = Matrix metalloproteinase-2; Panx1 = Pannexin-1; PPE = Porcine pancreatic elastase perfusion.

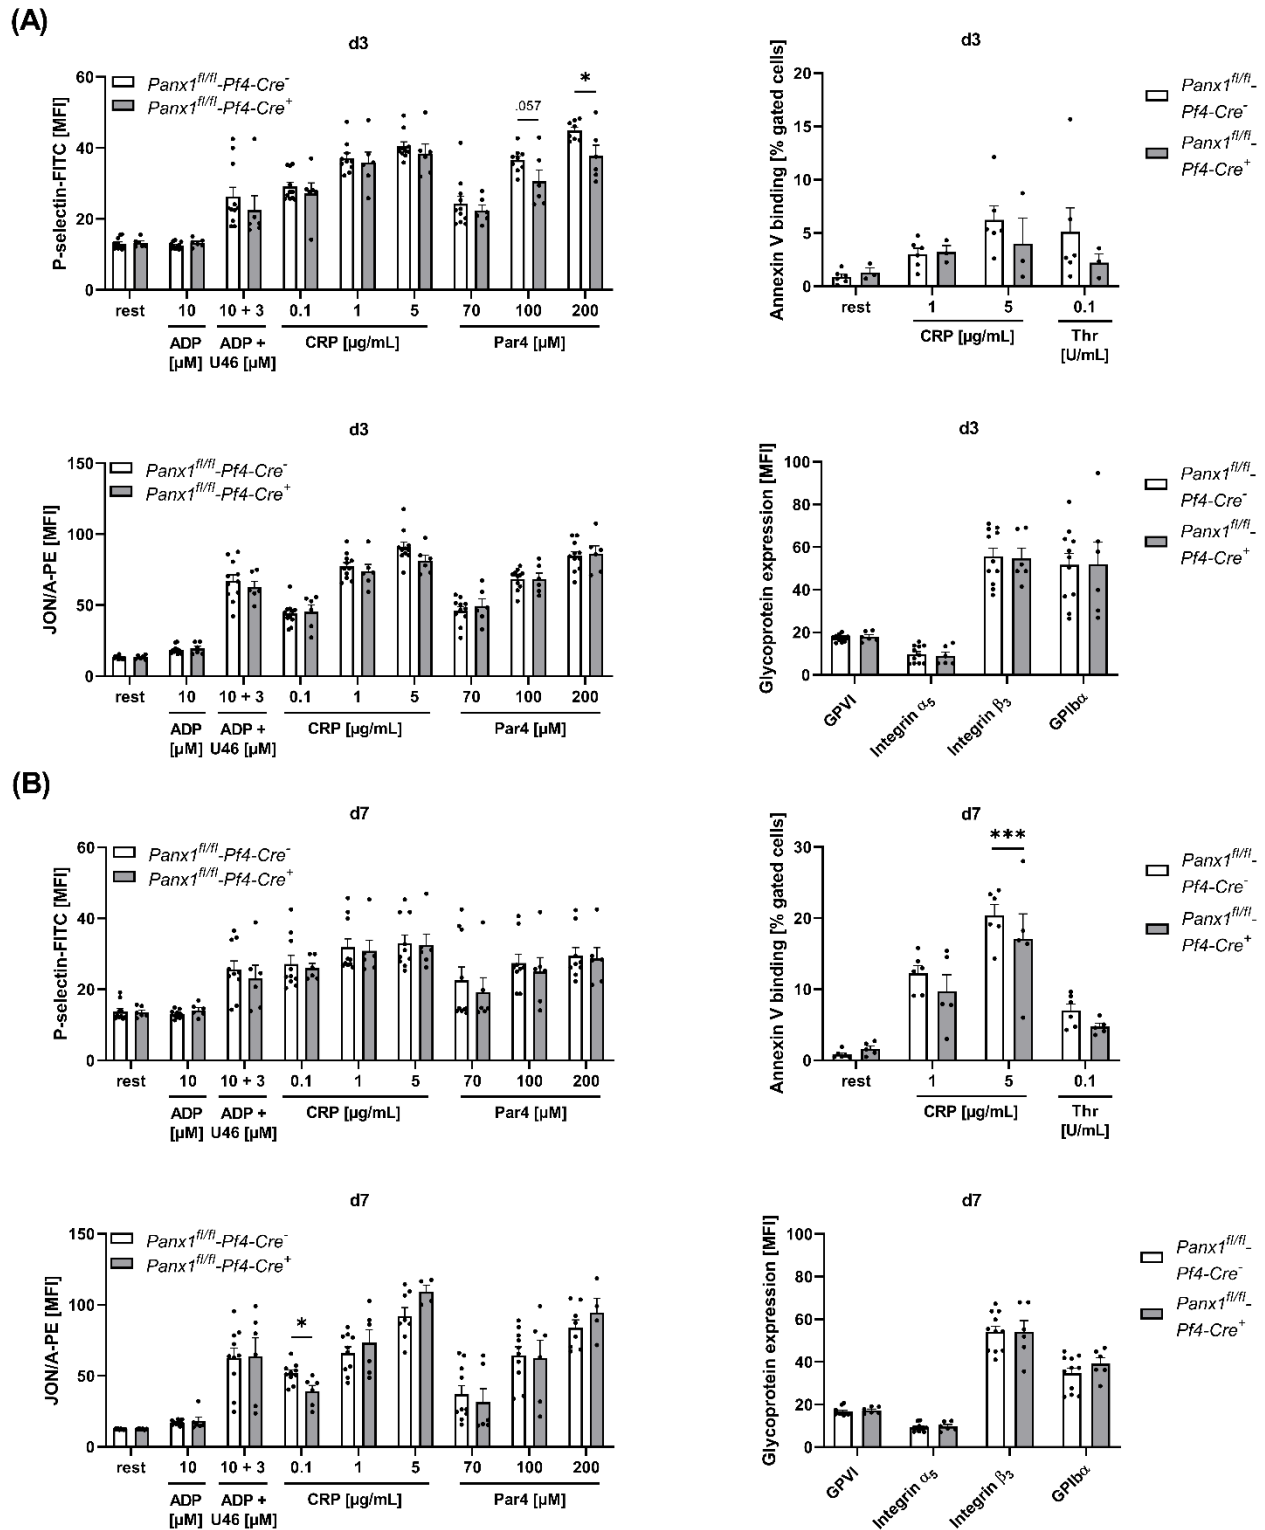

**Supplementary Figure 2.** Platelets of *Panx1* deficient mice reveal an unaltered platelet degranulation, activation and PS-exposure during the inflammatory phase of AAA development. Washed platelets from PPE operated *Panx1* WT (*Panx1* *fl/fl* *Pf4-Cre*<sup>-</sup>) and *Panx1* KO (*Panx1* *fl/fl* *Pf4-Cre*<sup>+</sup>) mice were analysed via flow cytometry at day 3 (A), and at day 7 (B) after surgery. (A-B) Platelet degranulation (P-selectin-FITC), integrin α<sub>IIb</sub>β<sub>3</sub> activation (JON/A-PE) and PS-exposure (Annexin V-Cy5 binding)

were analysed after platelet stimulation with indicate agonists. In addition, platelet surface expression of GPVI, integrin  $\alpha_5$ , integrin  $\beta_3$  and GPIb $\alpha$  was analysed via flow cytometry (Pax1 WT n=5-11; Pax1 KO n=4-6). Data are represented as mean values  $\pm$  SEM. Statistical analysis was performed using an (**A-B**) unpaired multiple student's t-test; \*p < 0.05, \*\*\*p < 0.001. ADP = Adenosine diphosphate; CRP = Collagen-related peptide; MFI = Mean fluorescence intensity; Pax1 = Pannexin-1; PAR4 = Protease-activated receptor 4 peptide; PPE = Porcine pancreatic elastase perfusion; Rest = resting; Thr = Thrombin; U46619 (U46) = Thromboxane A<sub>2</sub> analogue.

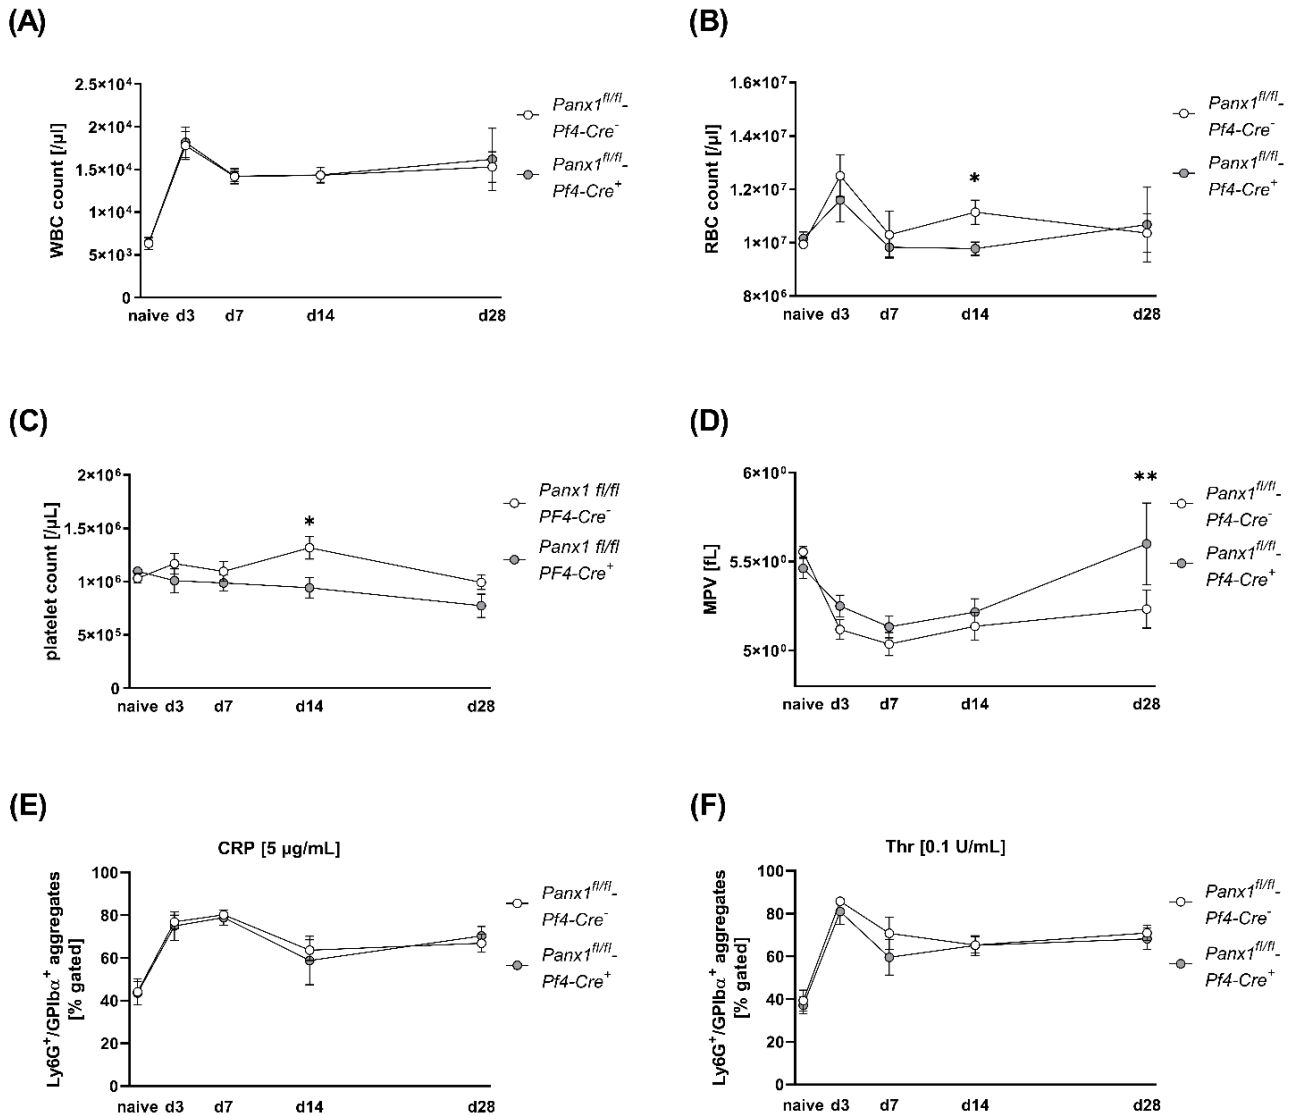

**Supplementary Figure 3.** Platelet Panx1 deficient mice reveal alteration in blood cell count and MVP during PPE induced AAA formation. **(A)** WBC, **(B)** RBC, **(C)** platelet counts and **(D)** the MPV of Panx1 WT (*Panx1 fl/fl PF4-Cre<sup>-</sup>*; n=7-11), respectively Panx1 KO (*Panx1 fl/fl PF4-Cre<sup>+</sup>*; n=5-7) mice were analysed at day 0 (naïve), 3, 7, 14, and day 28 after PPE surgery. **(E-F)** Platelet neutrophil aggregates in PPE operated Panx1 WT (n=6-11) and Panx1 KO (n=4-6) mice after stimulation with **(E)** CRP [5  $\mu\text{g/mL}$ ] or **(F)** thrombin [0.1 U/mL]. Aggregate formation was analysed at day 0 (naïve), 3, 7, 14 and 28 after PPE surgery via flow cytometry as double positive events for the platelet marker GPIb $\alpha$  (CD42b) and the neutrophil marker Ly6G. Data are represented as mean values  $\pm$  SEM. Statistical analysis **(A-F)** was performed using a two-way ANOVA with a Sidak's multiple comparisons post-hoc test; \*p < 0.05, \*\*p < 0.01. CRP = Collagen-related peptide; MPV = Mean platelet volume; Panx1 = Pannexin-1; PPE = Porcine pancreatic elastase perfusion; RBCs = Red Blood Cells, Thr = Thrombin; WBCs = White Blood Cells.

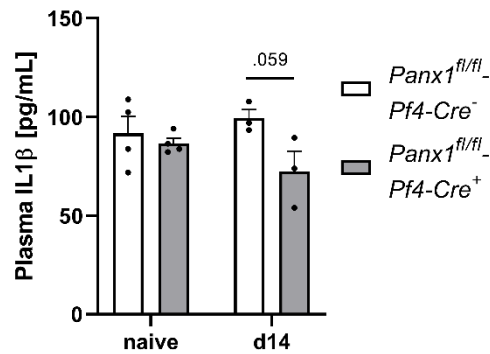

**Supplementary Figure 4.** Plasma IL1 $\beta$  level are unaltered in platelet Panx1 deficient mice during PPE induced AAA progression. IL1 $\beta$  plasma concentration of PPE operated Panx1 KO mice (n=3-5) at day 14 post surgery, compared to Panx1 WT mice (n=3-5). Plasma of naïve Panx1 WT (n=4) and Panx1 KO (n=4) mice served as control. Data are represented as mean values  $\pm$  SEM. Statistical analysis was performed using a two-way ANOVA with a Sidak's multiple comparisons post-hoc test; \*p < 0.05, \*\*p < 0.01, \*\*\*p < 0.001. IL-1 $\beta$  = Interleukin-1 $\beta$ ; Panx1 = Pannexin-1; PPE = Porcine Pancreatic Elastase.

(A)

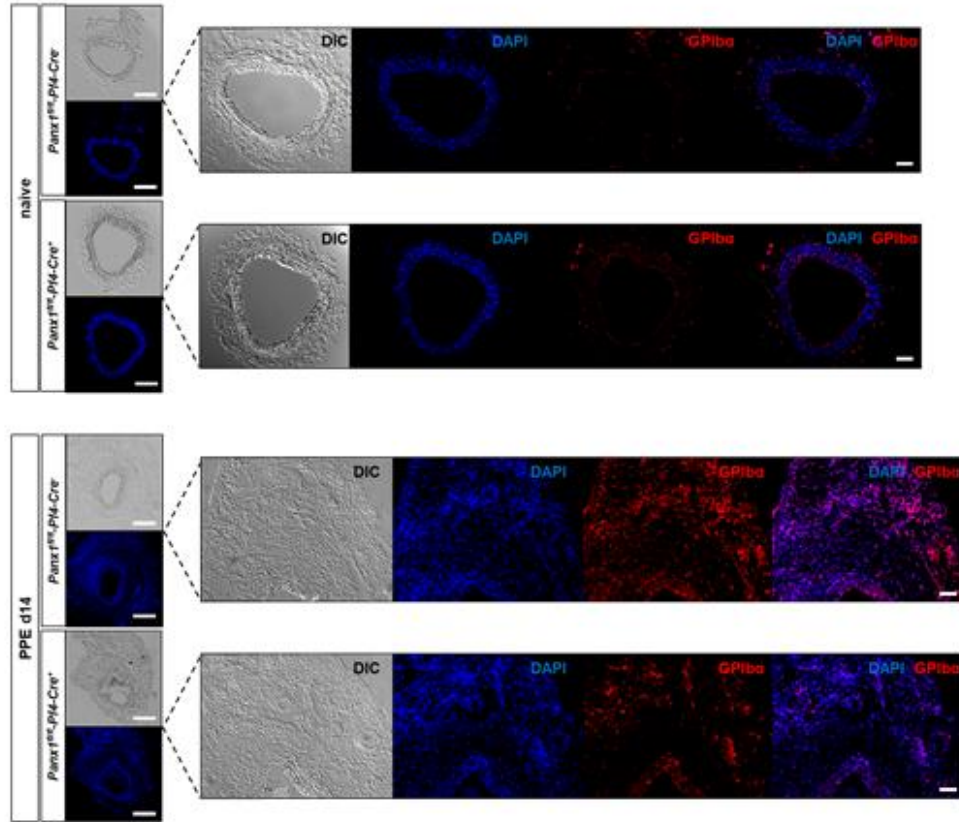

(B)

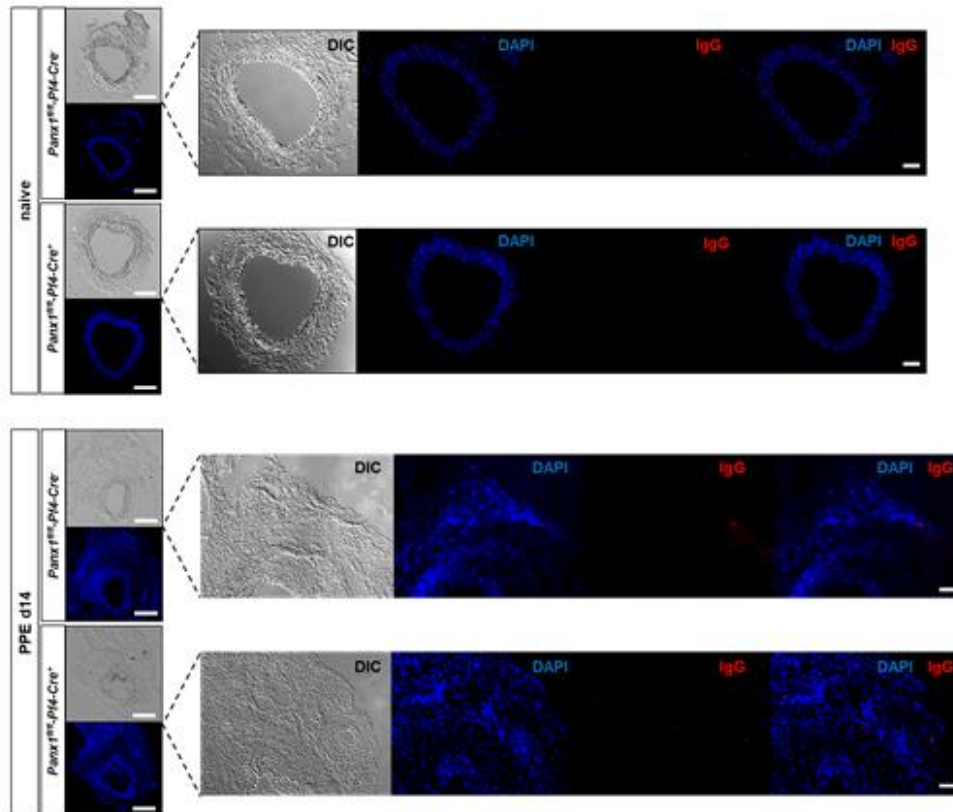

**Supplementary Figure 5.** Immunofluorescence staining of platelets within the aortic tissue of PPE operated Panx1 deficient mice. **(A)** Immunofluorescence staining of platelets (GPIb $\alpha$ /Cy5; red) in the aortic tissue of Panx1 WT (*Panx1 fl/fl PF4-Cre<sup>-</sup>*; n=3) and Panx1 KO (*Panx1 fl/fl PF4-Cre<sup>+</sup>*; n=3) mice at day 14 after PPE surgery and **(B)** the respective IgG controls (scale bar: 200  $\mu$ m and 50  $\mu$ m). Aortic tissue of naïve Panx1 WT (n=3) and Panx1 KO (n=4) mice served as control. DIC= Differential interference contrast; Panx1 = Pannexin-1



(A)

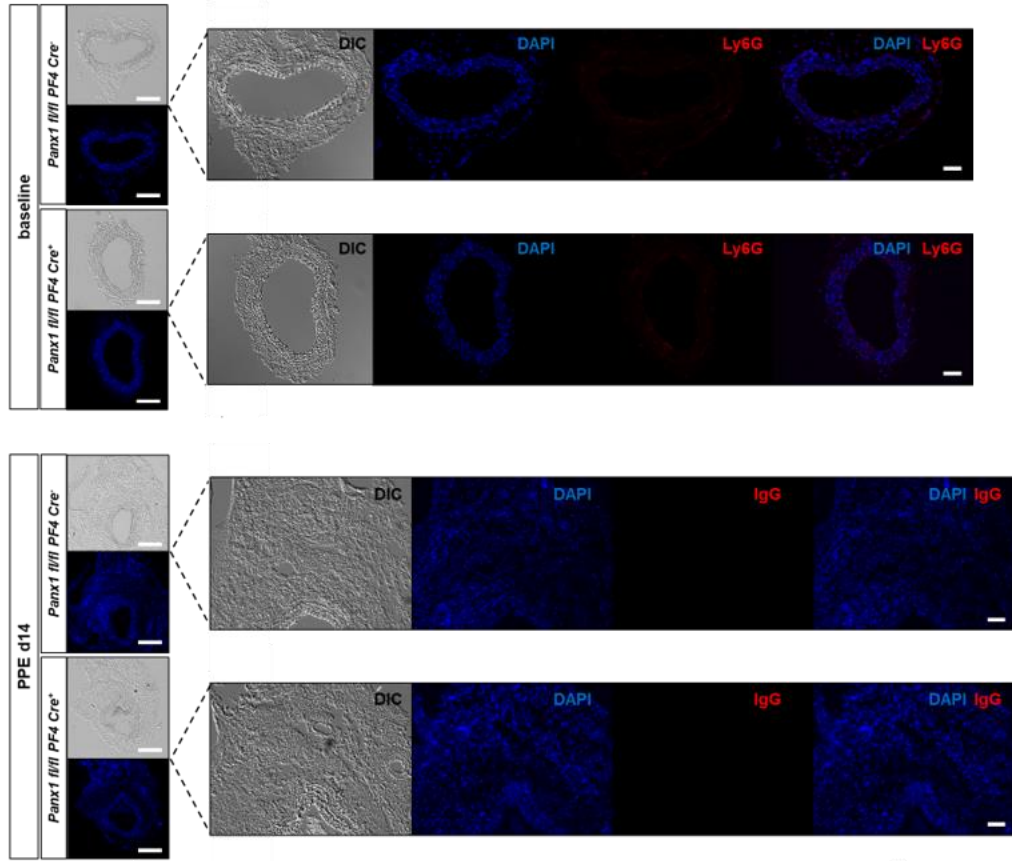

(B)

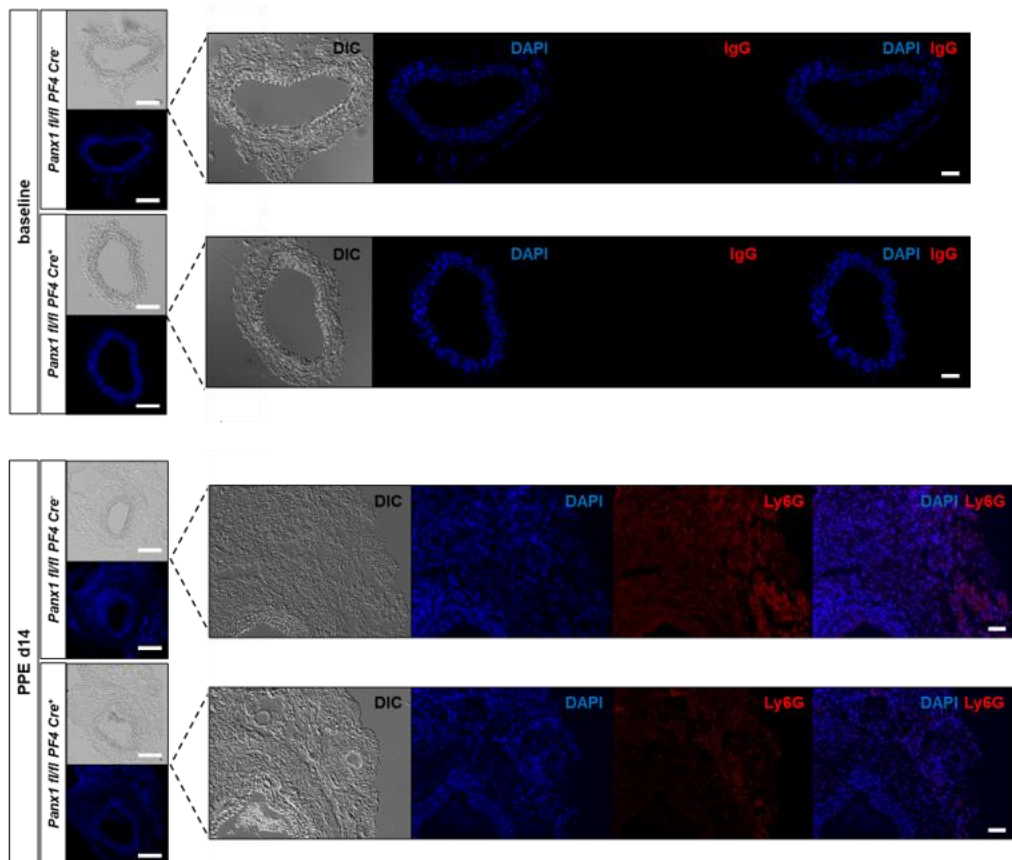

**Supplementary Figure 6.** Immunofluorescence staining of neutrophils within the aortic tissue of PPE operated Panx1 deficient mice. **(A)** Immunofluorescence staining of neutrophils (Ly6G/Cy5; red) in the aortic tissue of Panx1 WT (*Panx1 fl/fl PF4-Cre<sup>-</sup>*; n=3) and Panx1 KO (*Panx1 fl/fl PF4-Cre<sup>+</sup>*; n=3) mice at day 14 after PPE surgery and **(B)** the respective IgG controls (scale bar: 200  $\mu$ m and 50  $\mu$ m). Aortic tissue of naïve Panx1 WT (n=3) and Panx1 KO (n=4) mice served as control. DIC= Differential interference contrast; Panx1 = Pannexin-1
